# Supplementary material
Source: PubMed Central journal article supplement (PMC8130440)
Supplement: 12936_2021_3767_MOESM2_ESM.pdf [file 12936_2021_3767_MOESM2_ESM.pdf]

Supplementary Figure S1

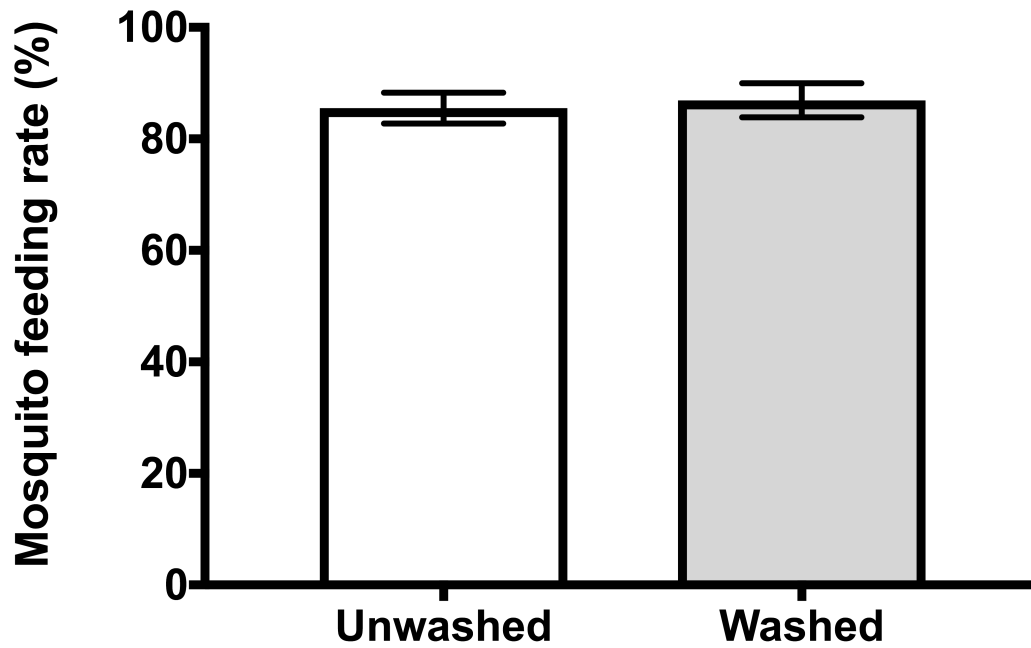

Figure S1. Effect of serum replacement on mosquito feeding rate of lab-colonized *An. stephensi*. Blood feeding rate was determined as the number of engorged mosquitoes/number of mosquitoes tested  $\times$  100. Whole blood (unwashed) and serum replaced-blood (washed) were used for feeding experiments. Data are represented as mean  $\pm$  standard deviations from twenty independent experiments.
